# Supplementary material for: Highly robust tetrazolate based complexes for efficient and long-term stable dye sensitized solar cells
Source: Royal Society of Chemistry journal article supplement (doi:10.1039/c5ra11984g), 2015-01-01
Supplement: c5ra11984g1.pdf [file c5ra11984g1.pdf]

## Highly Robust Tetrazolate Based Complexes for Efficient and Long-term Stable Dye Sensitized Solar Cells

Tharallah A. Shoker, Ralph Tanios, Remi Fayyad and Tarek H. Ghaddar\*

Department of Chemistry, American University of Beirut, Beirut 11-0236, Lebanon

Supporting Information:

T120

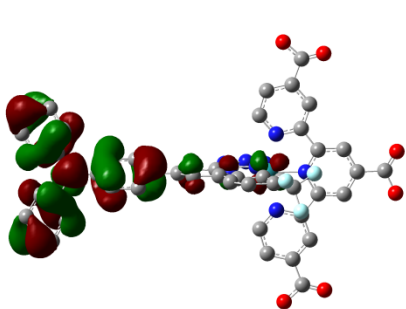

HOMO

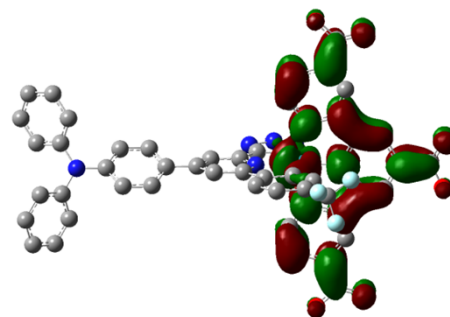

LUMO

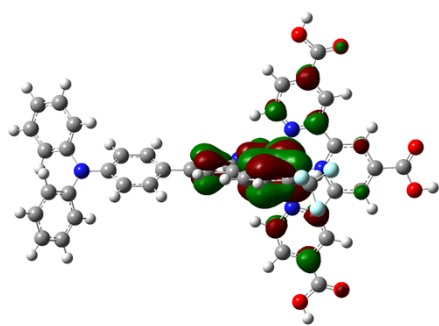

HOMO-1

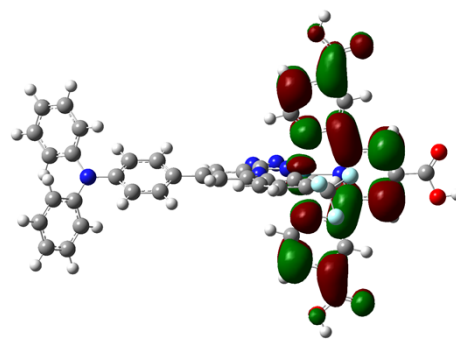

LUMO+1

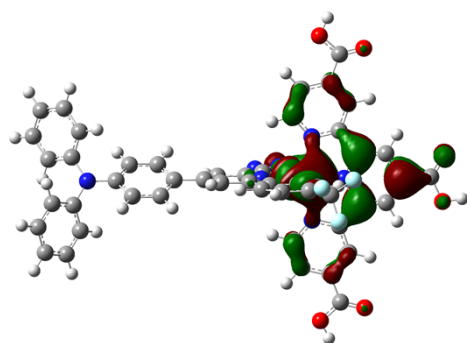

HOMO-2

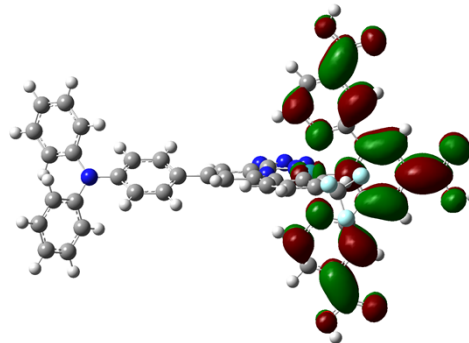

LUMO+2

T147

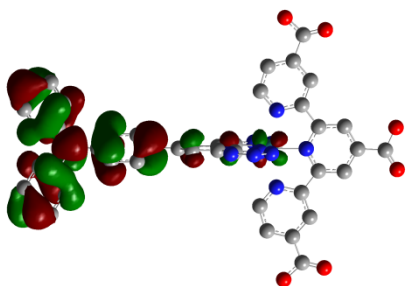

HOMO

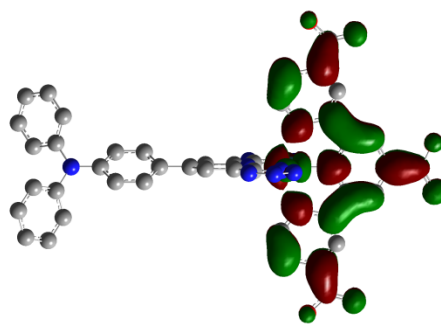

LUMO

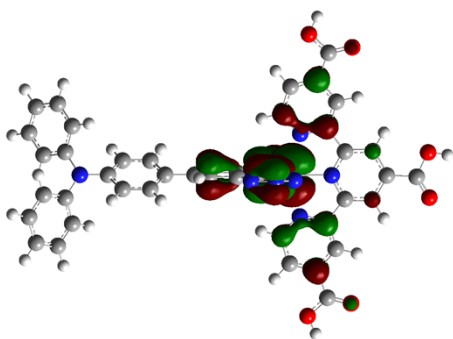

HOMO-1

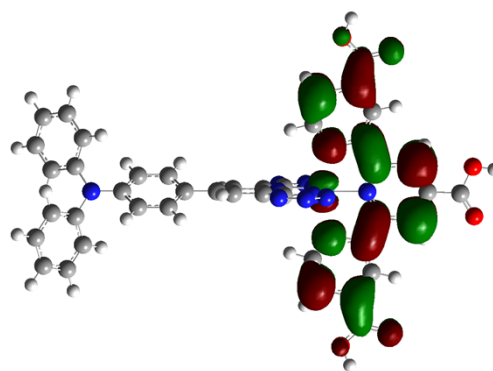

LUMO+1

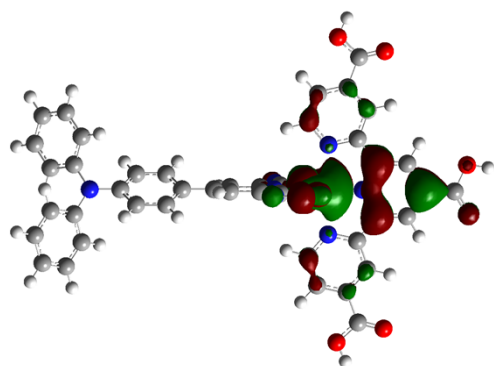

HOMO-2

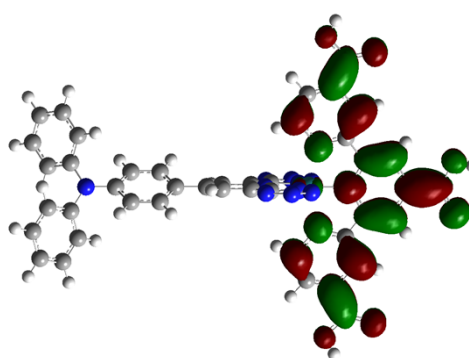

LUMO+2

T162

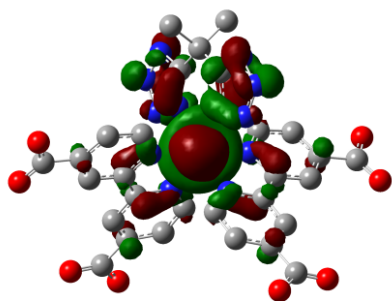

HOMO

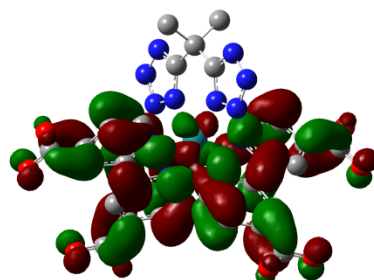

LUMO

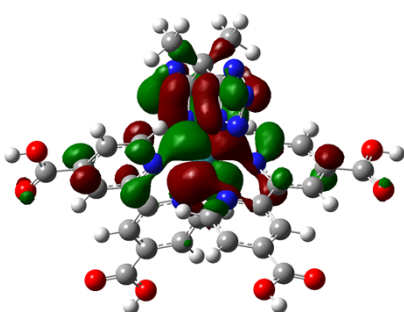

HOMO-1

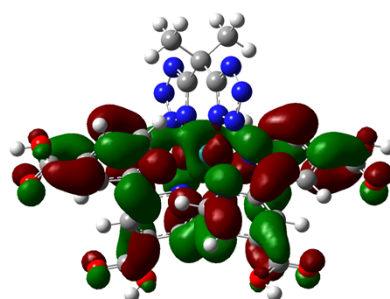

LUMO+1

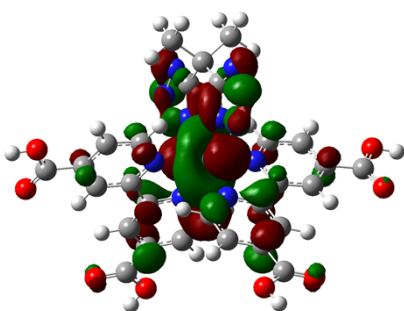

HOMO-2

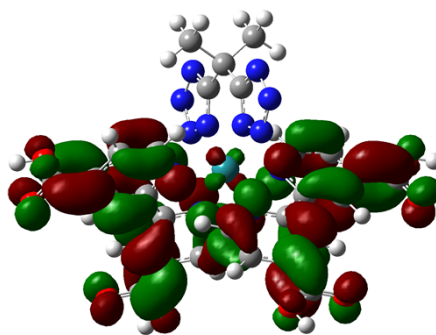

LUMO+2

**Scheme S1:** The isodensity plots shown are for the HOMO and LUMO of T120, T147 and T162.

**Table S1:** Calculated spectra of T120, T147 and T162 above 460 nm

| Dye         | nm          | Oscillator Strength          | (Assignment; H=HOMO and L=LUMO) |
|-------------|-------------|------------------------------|---------------------------------|
| <b>T120</b> | 696.9       | 0.028                        | H-1->L+0(+94%)                  |
|             | 585.8       | 0.0273                       | H-2->L+0(+53%) H-1->L+1(45%)    |
|             |             |                              | H-2->L+1(6%)                    |
|             | 530.7       | 0.0877                       | H-2->L+1(+84%)                  |
|             | 494.5       | 0.1895                       | H-1->L+1(+43%) H-2->L+0(+32%)   |
|             |             |                              | H-1->L+3(+10%) H-2->L+2(+10%)   |
|             | 454.6       | 0.2001                       | H-1->L+2(+88%)                  |
|             | 443.6       | 0.0391                       | H-1->L+4(+91%)                  |
|             | 434         | 0.7877                       | H-2->L+2(+50%) H-0->L+4(+39%)   |
|             | 430.8       | 0.1304                       | H-1->L+3(+46%) H-0->L+4(+29%)   |
|             |             |                              | H-2->L+2(19%)                   |
|             | 426.4       | 0.0112                       | H-2->L+3(+82%) H-2->L+4(+16%)   |
|             | 422.7       | 0.0114                       | H-0->L+3(+79%) H-3->L+3(+13%)   |
|             |             |                              |                                 |
|             | <b>T147</b> | 626.5                        | 0.0354                          |
| 525         |             | 0.0353                       | H-2->L+0(+54%) H-1->L+1(44%)    |
| 466.9       |             | 0.0632                       | H-2->L+1(+95%)                  |
| 461.4       |             | 0.6183                       | H-1->L+1(+39%) H-2->L+0(+26%)   |
|             |             |                              | H-0->L+4(+25%)                  |
| 435.1       |             | 0.4077                       | H-0->L+4(+70%) H-1->L+3(9%)     |
|             |             |                              | H-2->L+0(9%) H-1->L+1(8%)       |
| 415.5       |             | 0.1717                       | H-1->L+2(+93%)                  |
|             |             |                              |                                 |
| <b>T162</b> | 569.6       | 0.0201                       | H-1->L+1(+83%) H-2->L+0(14%)    |
|             | 507         | 0.2109                       | H-2->L+0(+82%) H-1->L+1(+14%)   |
|             | 474.7       | 0.0179                       | H-2->L+1(+62%) H-0->L+3(23%)    |
|             |             |                              | H-1->L+0(+9%)                   |
|             | 430.9       | 0.0396                       | H-0->L+2(+67%) H-1->L+3(+29%)   |
|             | 427         | 0.0119                       | H-1->L+2(+68%) H-0->L+3(+26%)   |
| 421.7       | 0.2004      | H-1->L+3(+65%) H-0->L+2(29%) |                                 |

<sup>a</sup> Only bands with oscillator strength > 0.01 are listed

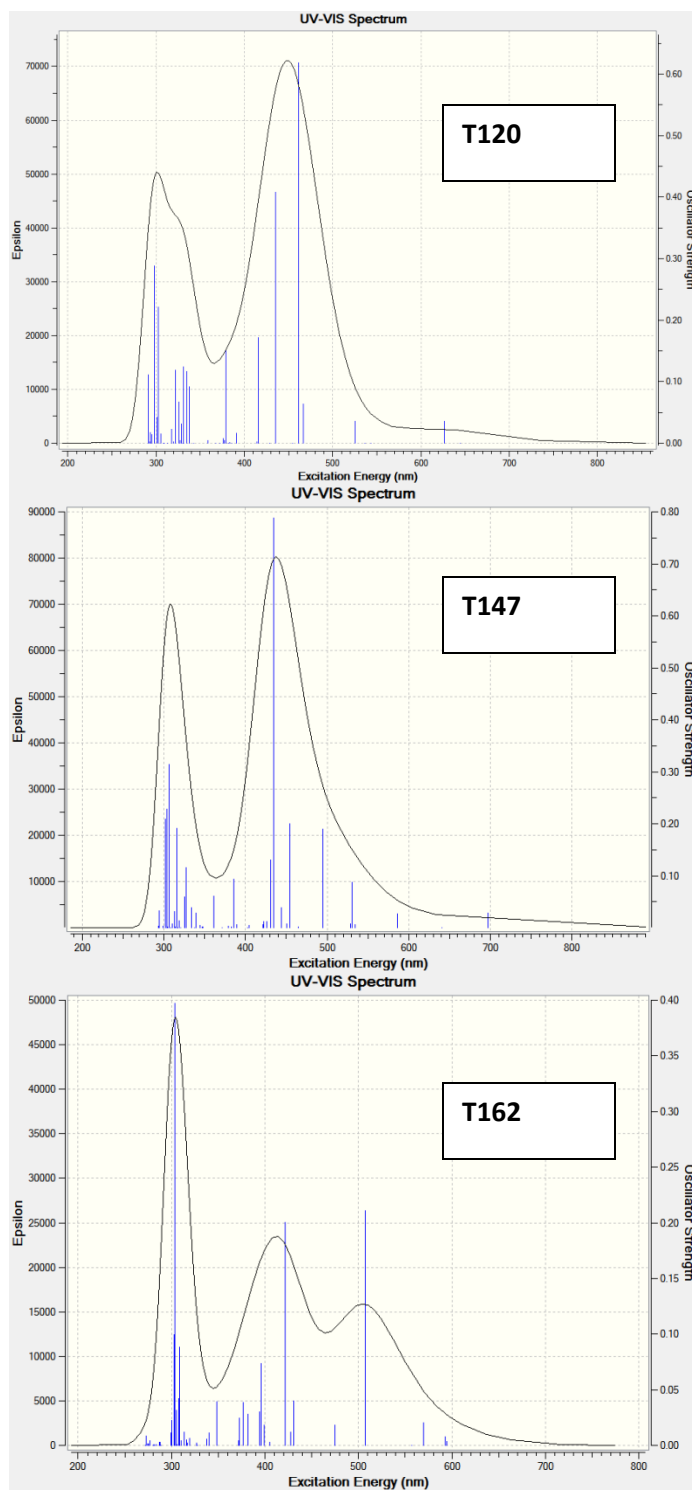

**Figure S1:** The computed absorption spectra of T120, T147 and T162 as measured in water.

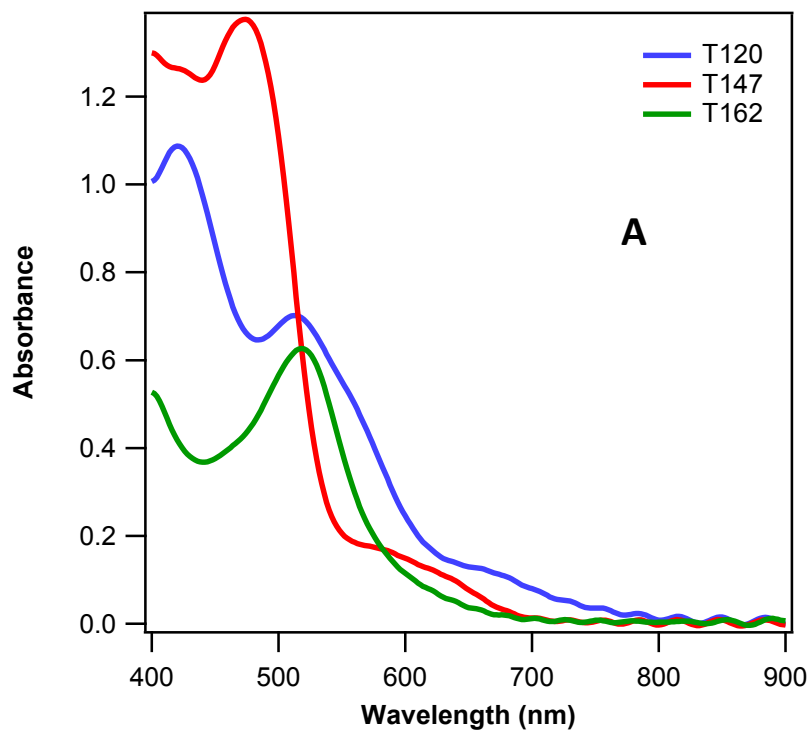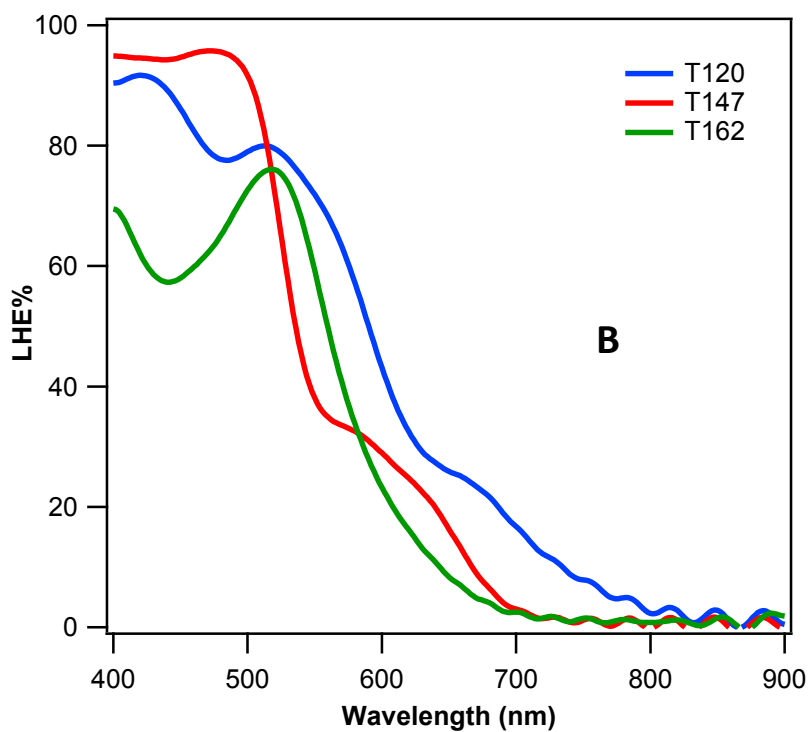

**Figure S2:** **A)** Absorption spectra of 6 μm TiO<sub>2</sub> films of T120, T147 and T162. **B)** The calculated light harvesting efficiencies (LHE%) of 6 μm TiO<sub>2</sub> films of T120, T147 and T162.

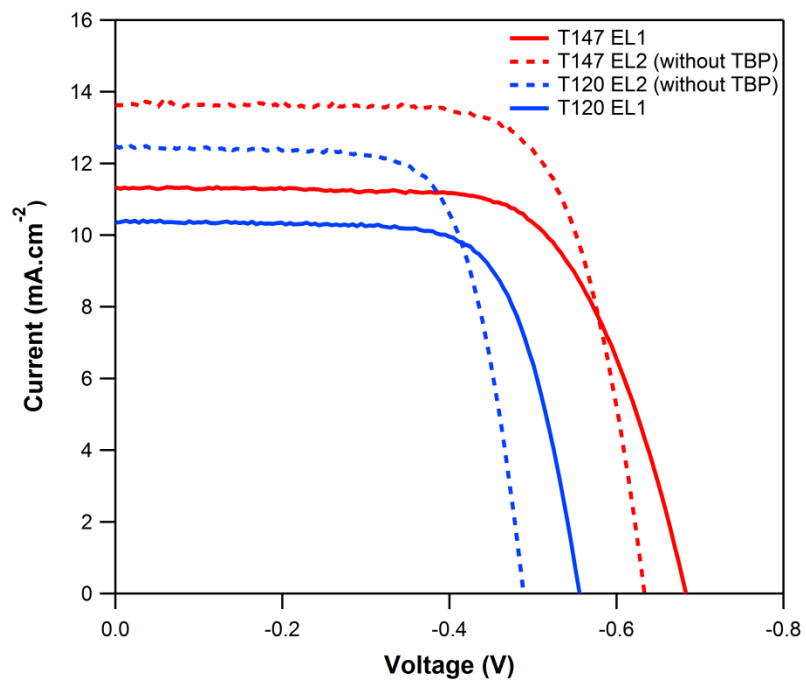

**Figure S3:** Photocurrent–voltage characteristics of DSSCs sensitized with dyes: T147 (red) and T120 (blue), assembled with electrolyte EL1 (solid) and EL2 (dashed).
